# Supplementary material
Source: bioRxiv or medRxiv preprint supplement (https://medrxiv.org/highwire/filestream/77525/field_highwire_adjunct_files/1/2020.04.19.20071563-2.pdf)
Supplement: Supplementary file [file 2020.04.19.20071563-2.pdf]

| INFORMATION                                       | QUESTIONS                                                                              | % (n) OF SUBJECTS                           |                                              |
|---------------------------------------------------|----------------------------------------------------------------------------------------|---------------------------------------------|----------------------------------------------|
| <b>Professional information</b>                   | Medical Doctor                                                                         | 26.13% (190)                                |                                              |
|                                                   | Nurse                                                                                  | 29.16% (212)                                |                                              |
|                                                   | Obstetrician                                                                           | 7.29% (53)                                  |                                              |
|                                                   | Healthcare operator                                                                    | 9.49% (69)                                  |                                              |
|                                                   | Administration staff                                                                   | 8.80% (64)                                  |                                              |
|                                                   | Laboratory technician                                                                  | 2.20% (16)                                  |                                              |
|                                                   | Radiology technician                                                                   | 1.24% (9)                                   |                                              |
|                                                   | Others                                                                                 | 15.68% (114)                                |                                              |
| <b>Professional risk in the last three months</b> | Performance of invasive maneuvers (e.g. aerosol / bronchoalveolar lavage / intubation) | 18.29% (133)                                |                                              |
|                                                   | Performance of Covid19 swabs on a patient                                              | 8.39% (61)                                  |                                              |
| <b>Epidemiological risk</b>                       | Unknown contacts with positive/suspect Covid-19                                        | 76.75% (558)                                |                                              |
|                                                   | Contact with symptomatic/positive Covid-19                                             | 10.87% (79)                                 |                                              |
|                                                   | Contact with symptomatic/negative Covid-19                                             | 3.16% (23)                                  |                                              |
|                                                   | Contact with asymptomatic/positive Covid-19                                            | 5.78% (42)                                  |                                              |
|                                                   | Contact with symptomatic/suspect without Covid-19 confirmation                         | 3.44% (25)                                  |                                              |
| <b>Personal medical history</b>                   | Chronic conditions                                                                     | 36.04% (262)                                |                                              |
|                                                   | Chronic drugs                                                                          | 33.43% (243)                                |                                              |
|                                                   | Flu vaccine (2019-2020)                                                                | 34.94% (254)                                |                                              |
|                                                   | In the last three months ( $\alpha$ )                                                  | Temperature $>37.5^{\circ}\text{C}$         | $\alpha$ 17.47% (127)<br>$\beta$ 0.14% (1)   |
|                                                   |                                                                                        | Cough                                       | $\alpha$ 34.11% (248)<br>$\beta$ 7.84% (57)  |
|                                                   | Dyspnea                                                                                |                                             | $\alpha$ 7.02% (51)<br>$\beta$ 2.48% (18)    |
|                                                   | Muscular pain                                                                          | $\alpha$ 23.80% (173)<br>$\beta$ 6.60% (48) |                                              |
|                                                   |                                                                                        | Conjunctivitis                              | $\alpha$ 9.22% (67)<br>$\beta$ 3.03% (22)    |
|                                                   | Diarrhea                                                                               | $\alpha$ 17.33% (126)<br>$\beta$ 2.06% (15) |                                              |
|                                                   |                                                                                        | Tiredness                                   | $\alpha$ 29.02% (211)<br>$\beta$ 10.32% (75) |
|                                                   | Respiratory symptoms                                                                   | $\alpha$ 13.76% (100)<br>$\beta$ 2.06% (15) |                                              |
|                                                   |                                                                                        | Cold                                        | $\alpha$ 46.63% (339)                        |

|  |                                         |                                               |
|--|-----------------------------------------|-----------------------------------------------|
|  |                                         | $\beta$ 10.32% (75)                           |
|  | Nasal stuffiness                        | $\alpha$ 39.61% (288)<br>$\beta$ 17.47% (127) |
|  | Pneumonia                               | $\alpha$ 1.38% (10)<br>$\beta$ 0% (0)         |
|  | Anosmia                                 | $\alpha$ 4.26% (31)<br>$\beta$ 1.79% (13)     |
|  | Dysgeusia                               | $\alpha$ 3.85% (28)<br>$\beta$ 0.96% (7)      |
|  | Nausea                                  | $\alpha$ 12.52% (91)<br>$\beta$ 2.34% (17)    |
|  | Inappetence                             | $\alpha$ 8.12% (59)<br>$\beta$ 0.69% (5)      |
|  | Headache                                | $\alpha$ 40.99% (298)<br>$\beta$ 15.96% (116) |
|  | Any acute illness in the last two weeks | 3.85% (28)                                    |

**Supplementary Table 2:** Medical history and health status questionnaire. The first column (QUESTIONS) indicates the healthcare workers categories and the questions asked; the second column (% (N) OF SUBJECTS) reports the prevalence for each of the considered variables
